# Supplementary material for: The transcriptional regulator network of human inflammatory macrophages is defined by open chromatin
Source: PubMed Central journal article supplement — Cell Res. 2016 Jan 5;26(2):151–70. doi: 10.1038/cr.2016.1 (PMC4746609; doi:10.1038/cr.2016.1), 2016-01-05
Supplement: cr20161x2.pdf [file cr20161x2.pdf]

Supplementary information, Figure S2

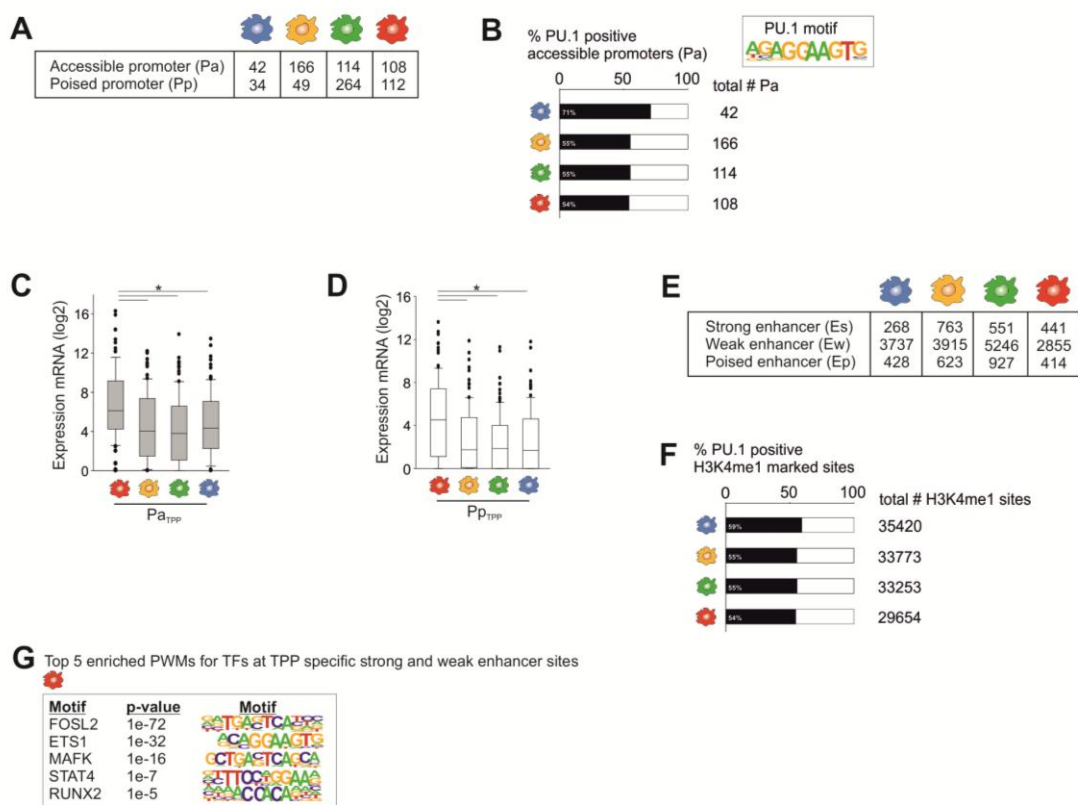

**Figure S2: Activation-specific specific promoter and enhancer marks**

(A) Numbers of genes with accessible (Pa) or poised (Pp) promoters in inflammatory GM-CSF derived macrophages and each macrophage activation condition. (B) Percentage of activation-specific gene loci with PU.1 binding (black bars) at accessible promoters determined by ChIP-seq analysis. (C-D) Box-and-Whiskers plots showing expression levels of genes with  $M^{TPP}$ -specific (C) accessible promoters ( $Pa_{TPP}$ ) and (D) poised promoters ( $Pp_{TPP}$ ) investigated in the three macrophage activation conditions (Kruskal-Wallis One Way ANOVA on ranks with pairwise multiple comparison according to Tukey test, \*\*\* $p < 0.05$ ). (E) Numbers of genes with macrophage activation-specific strong (Es), weak (Ew) and poised (Ep) enhancer marks. (F) Percentage of PU.1 positive enhancer sites in ChIP-seq data from  $M^b$  and three other macrophage activation conditions. (G) Motif enrichment analysis for transcription factor (TF) binding sites in genes with strong and weak enhancers in TPP activated macrophages. Displayed are the top 5 positional weight matrices (PWM) ranked according the binomial p-values for the enrichment.  $M^b$  (blue),  $M^{IFN\gamma}$  (yellow),  $M^{IL4}$  (green) and  $M^{TPP}$  (red); RNA-seq and ChIP-seq were derived from three independent experiments.
