# Supplementary material for: The transcriptional regulator network of human inflammatory macrophages is defined by open chromatin
Source: PubMed Central journal article supplement — Cell Res. 2016 Jan 5;26(2):151–70. doi: 10.1038/cr.2016.1 (PMC4746609; doi:10.1038/cr.2016.1), 2016-01-05
Supplement: cr20161x3.pdf [file cr20161x3.pdf]

Supplementary information, Figure S3

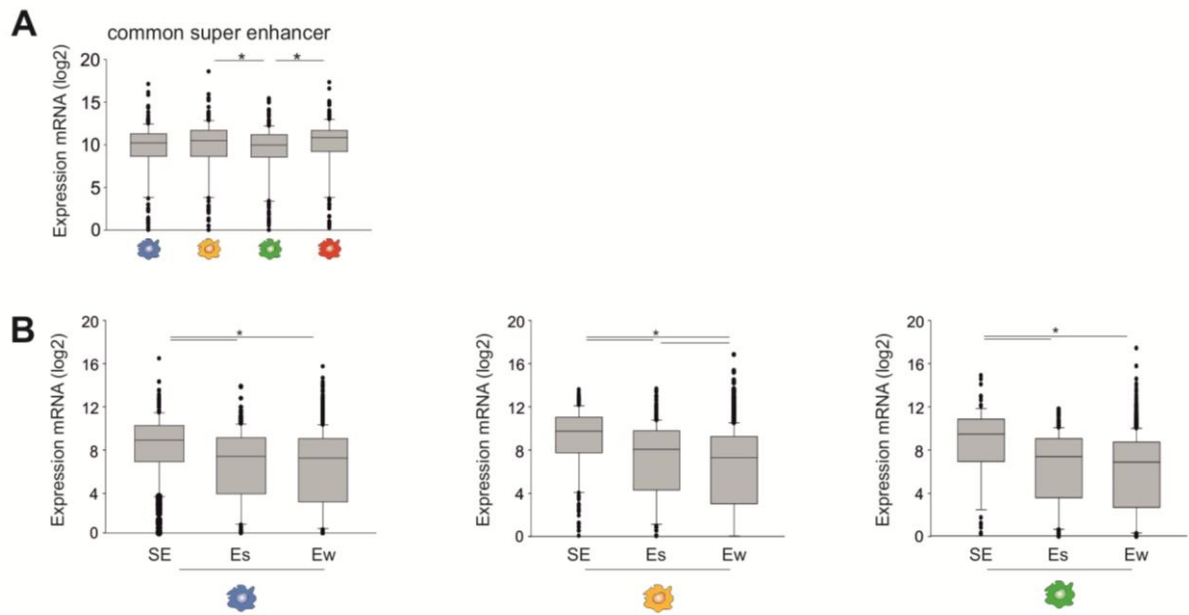

**Figure S3: Expression analysis of genes encompassing super enhancer**

**(A)** Box-and-Whiskers plots of RNA-seq expression values for genes with common super enhancers in each respective macrophage condition. **(B)** Box-and-Whiskers plots showing expression levels of genes with subtype-specific SEs, strong (Es), and weak (Ew) enhancers. Statistics in (A) and (B) were calculated by Kruskal-Wallis One Way ANOVA on ranks with pairwise multiple comparison according to Dunn's method, \* $p < 0.05$ ; M<sup>b</sup> (blue), M<sup>IFN $\gamma$</sup>  (yellow), M<sup>IL4</sup> (green) and M<sup>TPP</sup> (red); RNA-seq and ChIP-seq were derived from three independent experiments.
