# Supplementary material for: The transcriptional regulator network of human inflammatory macrophages is defined by open chromatin
Source: PubMed Central journal article supplement — Cell Res. 2016 Jan 5;26(2):151–70. doi: 10.1038/cr.2016.1 (PMC4746609; doi:10.1038/cr.2016.1), 2016-01-05
Supplement: cr20161x4.pdf [file cr20161x4.pdf]

Supplementary information, Figure S4

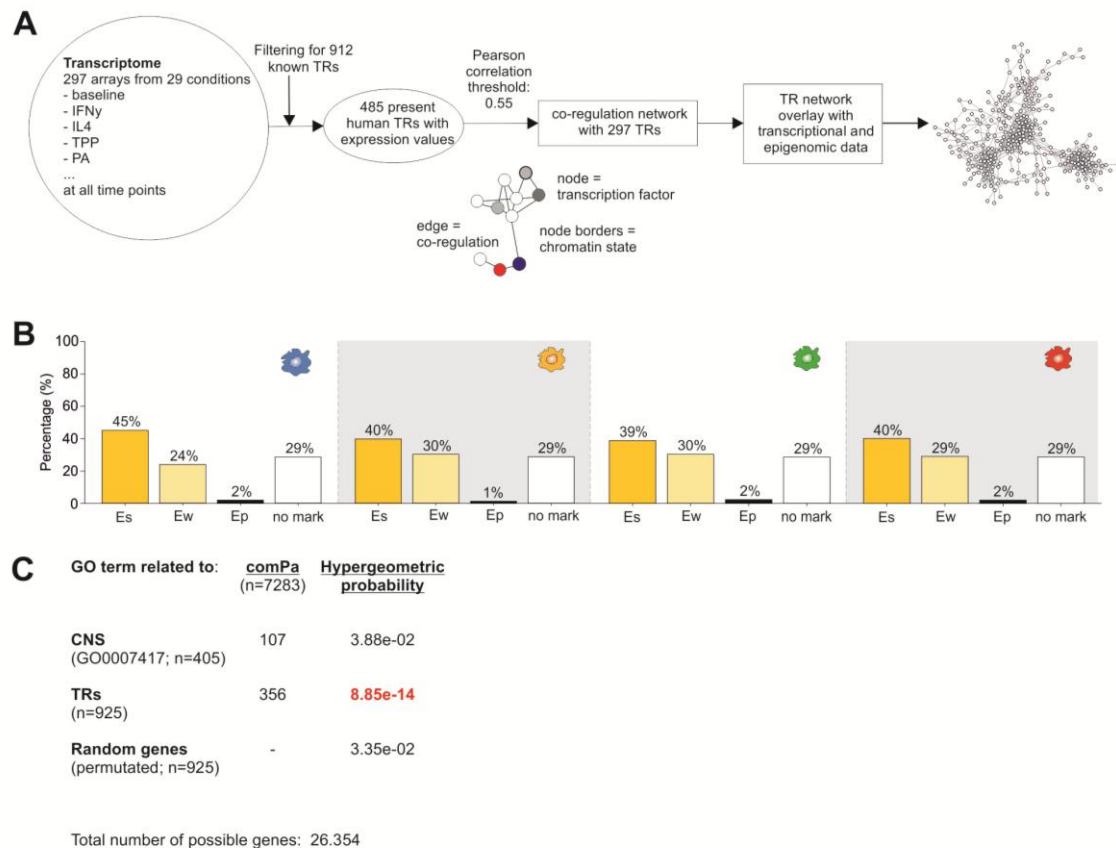

**Figure S4: Epigenetic landscape of transcriptional regulators in human inflammatory macrophages**

**(A)** Workflow for the generation of the co-regulation network for 297 TRs expressed by human activated macrophages. **(B)** Distribution of TRs belonging to the TR network with strong (Es), weak (Ew) or poised (Ep) enhancers in all four investigated inflammatory macrophages. **(C)** Hypergeometric probability for the enrichment of accessible promoters (Pa) in the TR networks in gene sets grouped according biological functions.
