# Supplementary material for: The transcriptional regulator network of human inflammatory macrophages is defined by open chromatin
Source: PubMed Central journal article supplement — Cell Res. 2016 Jan 5;26(2):151–70. doi: 10.1038/cr.2016.1 (PMC4746609; doi:10.1038/cr.2016.1), 2016-01-05
Supplement: cr20161x5.pdf [file cr20161x5.pdf]

Supplementary information, Figure S5

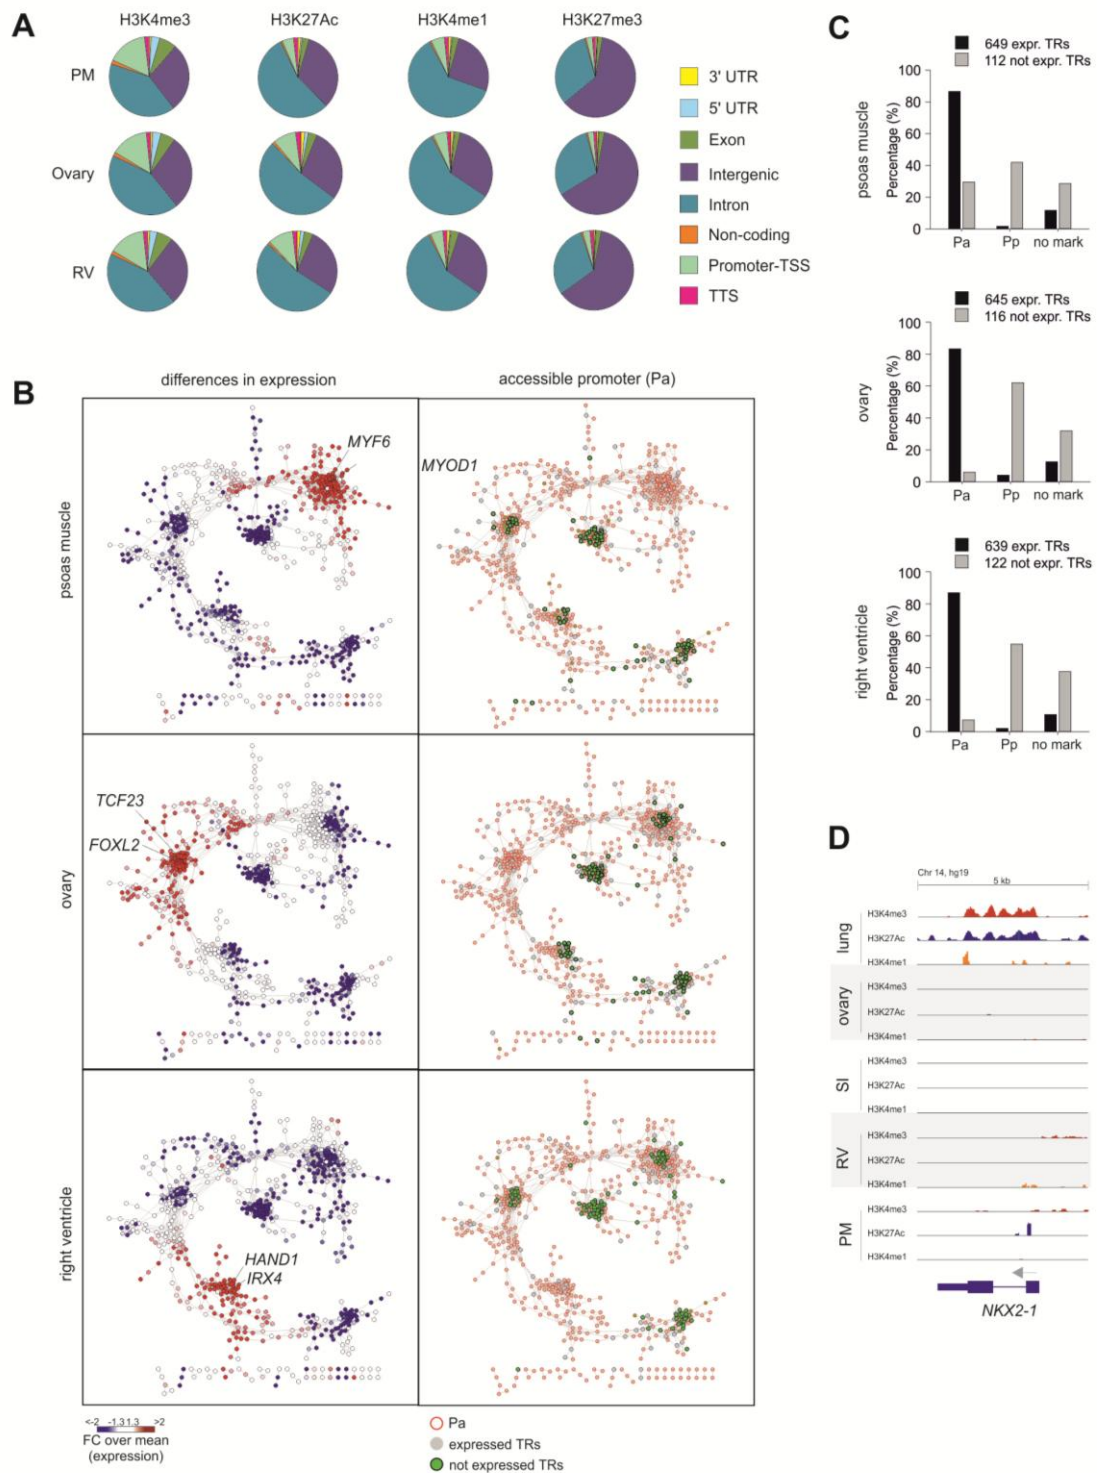

**Figure S5: Human tissue-related TR networks show a differential epigenetic regulation of TR loci**

**(A)** Distribution of the histone modifications H3K4me3, H3K27Ac, H3K4me1 and H3K27me3 to

genomic regions calculated for each human tissue separately. **(B)** Human tissue-related TR network for psoas muscle, ovary and right ventricle overlaid with information on fold-changes (FC) over the mean expression value (left panel) and promoter status (right panel). Red border: accessible promoters; grey nodes: expressed TRs (cut off for expression  $\geq 10$ ); green: not expressed TRs. **(C)** Bar charts for the distribution of TRs belonging to the tissue-related TR network grouped into expressed (black) and not expressed TRs (grey) with accessible or poised promoter marks. **(D)** Tissue-specific promoter marks for the TF NKX2-1. Consolidated RNA-seq and CHIP-seq data (n=1) of the Road map consortium<sup>5</sup>.
