# Supplementary material for: The transcriptional regulator network of human inflammatory macrophages is defined by open chromatin
Source: PubMed Central journal article supplement — Cell Res. 2016 Jan 5;26(2):151–70. doi: 10.1038/cr.2016.1 (PMC4746609; doi:10.1038/cr.2016.1), 2016-01-05
Supplement: cr20161x6.pdf [file cr20161x6.pdf]

Supplementary information, Figure S6

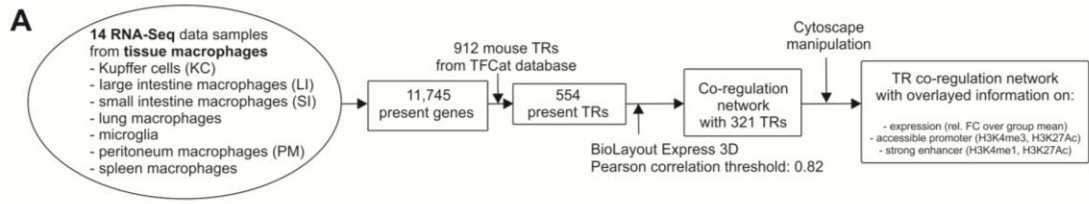

**B** Histone modification state of 358 TRs being not present in murine macrophages:

| Colonic | not expr. | Ileal   | not expr. | Microgl. | not expr. | Periton. | not expr. | Kupffer | not expr. | Spleen  | not expr. | Lung    | not expr. |
|---------|-----------|---------|-----------|----------|-----------|----------|-----------|---------|-----------|---------|-----------|---------|-----------|
| Pa      | 7 %       | Pa      | 5 %       | Pa       | 6 %       | Pa       | 8 %       | Pa      | 8 %       | Pa      | 6 %       | Pa      | 5 %       |
| Pp      | 39 %      | Pp      | 25 %      | Pp       | 50 %      | Pp       | 53 %      | Pp      | 44 %      | Pp      | 43 %      | Pp      | 42 %      |
| no mark | 54 %      | no mark | 70 %      | no mark  | 44 %      | no mark  | 39 %      | no mark | 48 %      | no mark | 51 %      | no mark | 53 %      |
| Es      | 9 %       | Es      | 0 %       | Es       | 4 %       | Es       | 13 %      | Es      | 9 %       | Es      | 31 %      | Es      | 0 %       |
| Ep      | 24 %      | Ep      | 0 %       | Ep       | 12 %      | Ep       | 28 %      | Ep      | 31 %      | Ep      | 3 %       | Ep      | 0 %       |
| no mark | 67 %      | no mark | 100 %     | no mark  | 84 %      | no mark  | 59 %      | no mark | 60 %      | no mark | 66 %      | no mark | 100 %     |

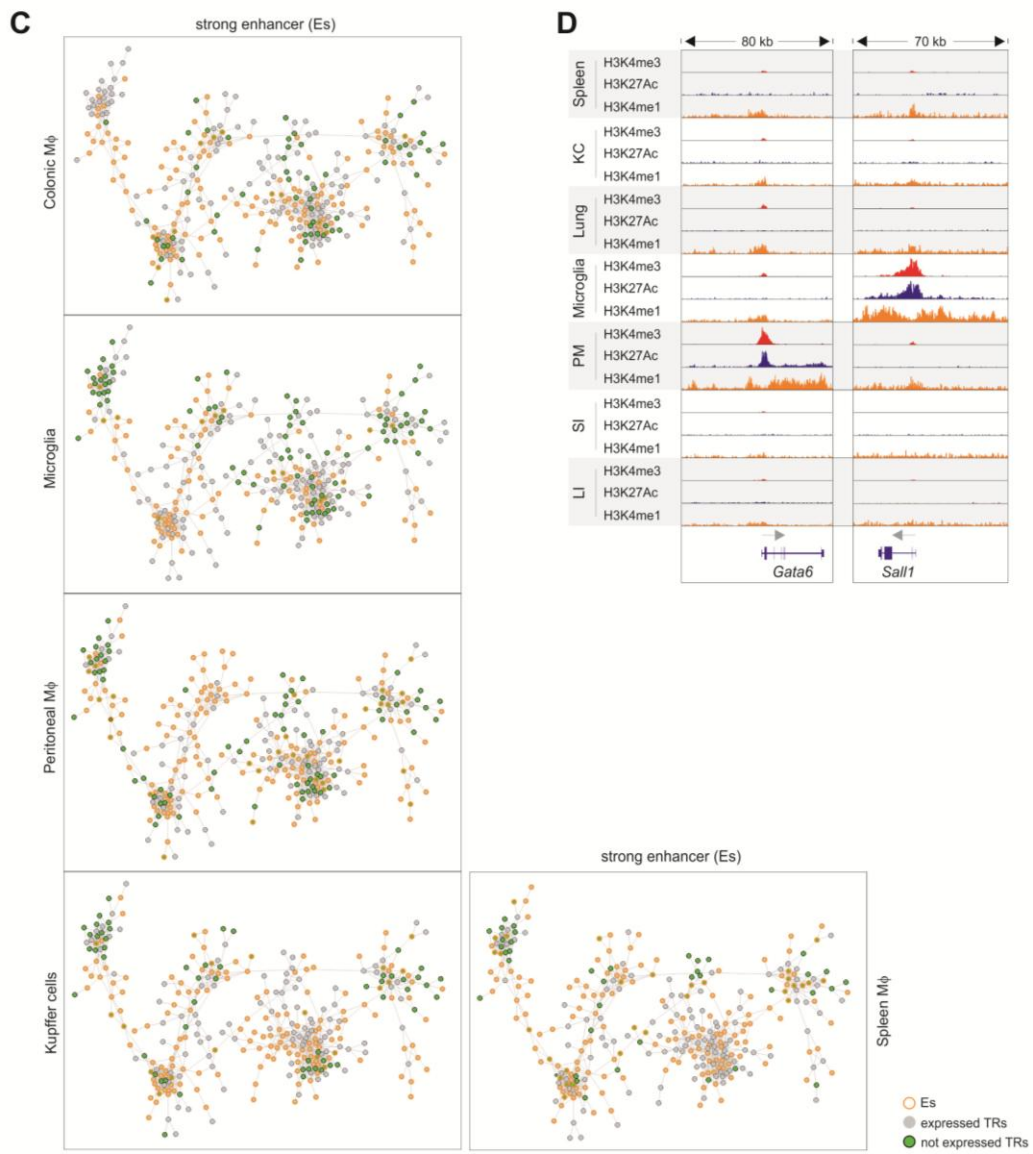

**Figure S6: Epigenetic landscape of TR of murine tissue macrophages**

**(A)** Bioinformatics approach for the generation of a murine tissue macrophage-related TR network build from 321 TRs. **(B)** Distribution of accessible (Pa) and poised promoters (Pp) and strong (Es) and poised (Ep) enhancers in the group of 358 TRs not being expressed in any of the analyzed tissue macrophages. **(C)** TR network overlaid with information on strong enhancer marks. Expressed TRs presented in grey, not expressed TRs in green/black. **(D)** Tissue macrophage-specific promoter marks for the TFs Gata6 and Sall1. RNA-seq and CHIP-seq were derived from two independent experiments <sup>6</sup>.
